# Supplementary material
Source: Springer Nature journal article supplement (https://www.springermedizin.de/resource/supplementary/13231_2012_71_MOESM2_ESM.pdf/9676480)

Mean  $\pm$  Standard Deviation

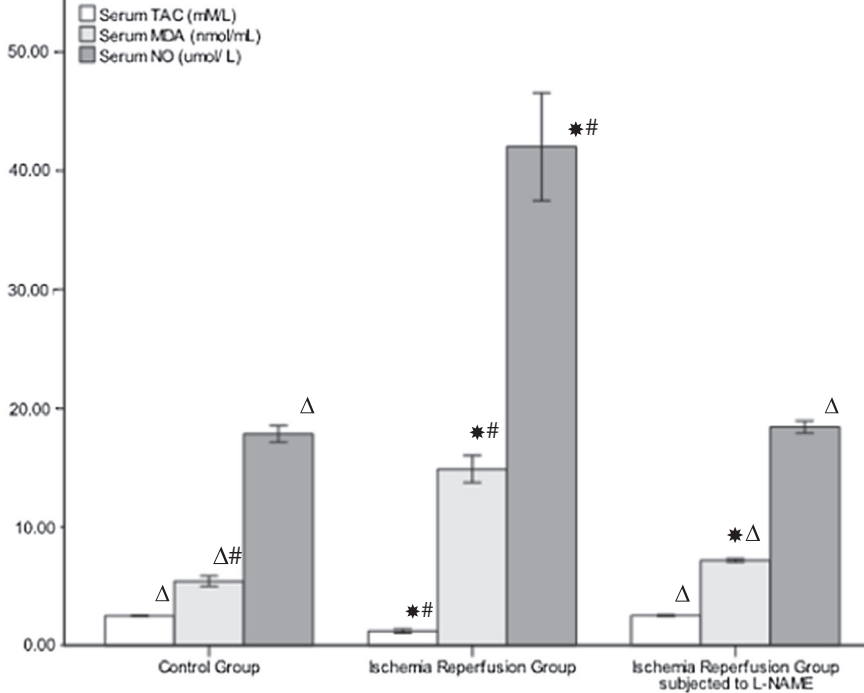

Supplement: MOESM2 [file 9676480]
